# Supplementary material
Source: Springer Nature journal article supplement (https://www.springermedizin.de/resource/supplementary/13058_2013_3448_MOESM6_ESM.pdf/9704034)

# Supplementary Figure: 4S

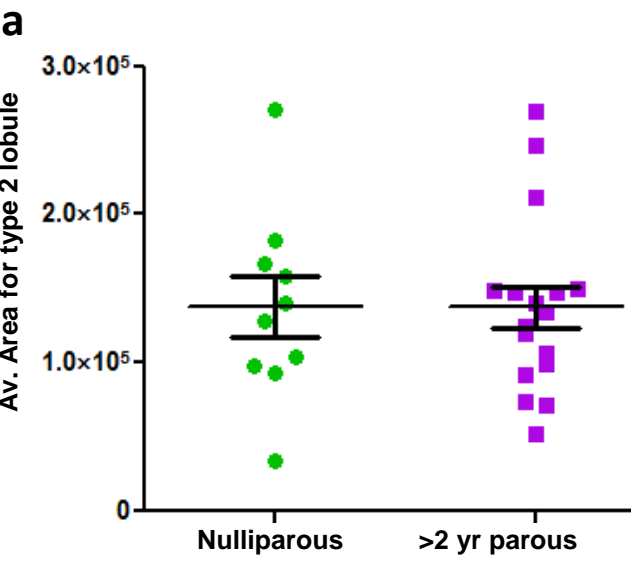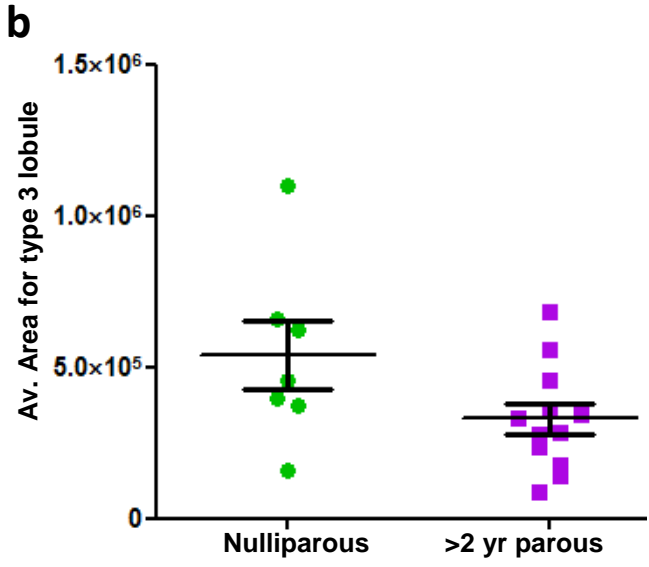

Supplement: MOESM6 [file 9704034]
